# Supplementary material for: The HGF/Met/NF-κB Pathway Regulates RANKL Expression in Osteoblasts and Bone Marrow Stromal Cells
Source: MDPI journal article supplement (doi:10.3390/ijms21217905), 2020-10-24

Supplementary Figure

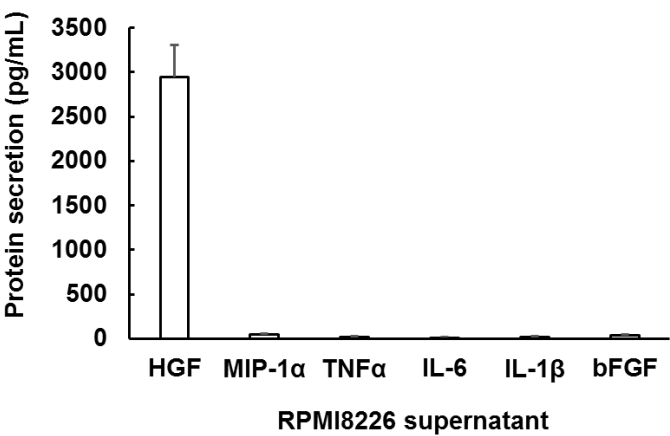

**Figure S1.** Secretion of HGF in RPMI8226 cells. Supernatants were collected after 48 hours in culture and analyzed for HGF, MIP-1 $\alpha$ , TNF $\alpha$ , IL-6, IL-1 $\beta$ , and bFGF by ELISA.

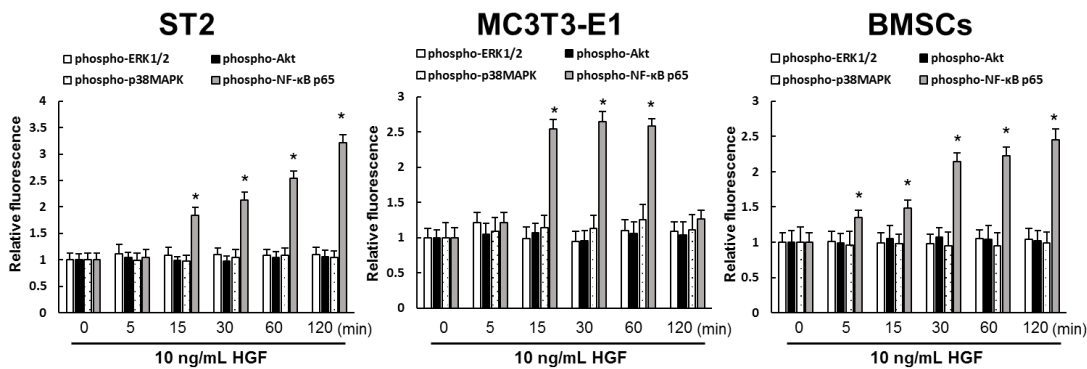

**Figure S2.** Expression of ERK, Akt, p38MAPK, and NF- $\kappa$ B phosphorylation by Luminex assay. Cells were lysed and phosphorylation of ERK1/2, p38MAPK, Akt, and NF- $\kappa$ B were measured by Luminex assay.

### ST2

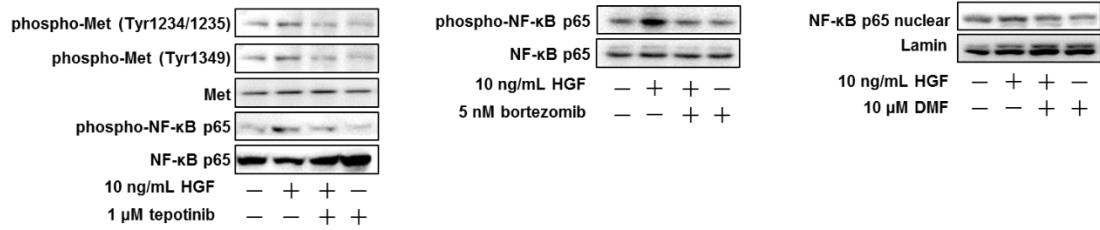

### MC3T3-E1

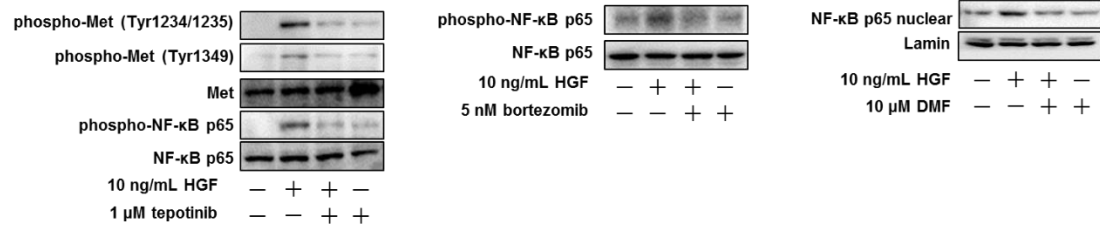

### BMSCs

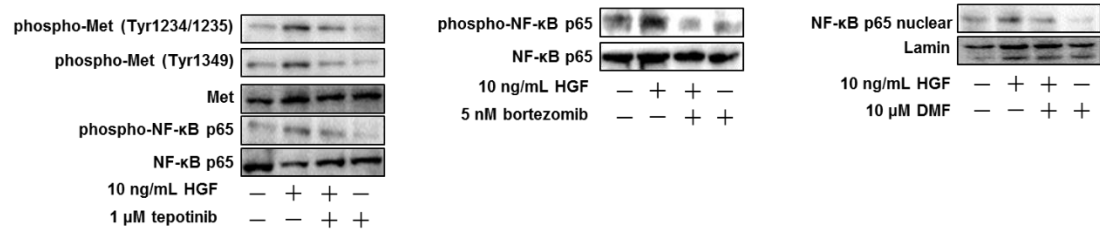

**Figure S3.** Effect of tepotinib, bortezomib, and DMF on HGF-induced NF-κB activation. ST2 cells, MC3T3-E1 cells, and mouse BMSCs were treated with 1 μM tepotinib, 5 nM bortezomib, or 10 μM DMF. After incubation for 72 h, HGF was added to give the final concentration of 10 ng/mL. After incubation for 72 h, the cell lysates were analyzed by western blotting using anti-phospho-Met (Tyr1234/1235) antibody, anti-phospho-Met (Tyr1349) antibody, anti-Met antibody, anti-phospho-NF-κB antibody, anti-NF-κB antibody, and anti-Lamin antibody.

Figure 1C

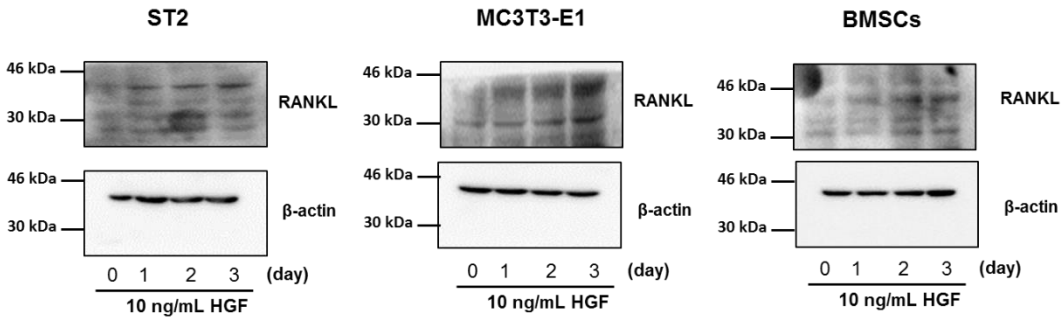

Figure 2A

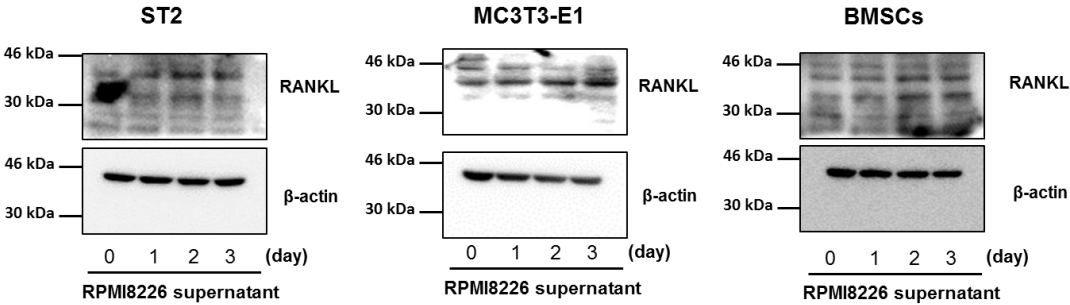

Figure 2C

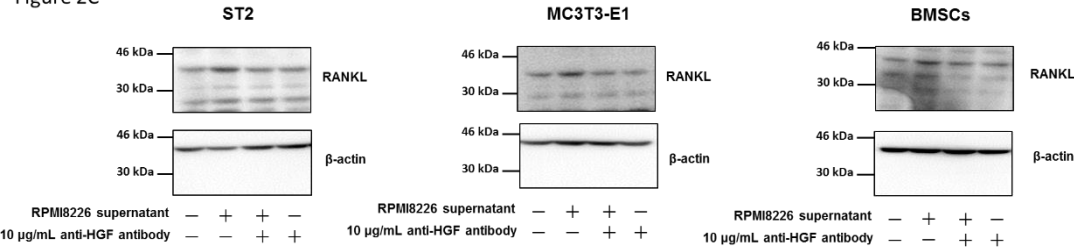

Figure 3A ST2

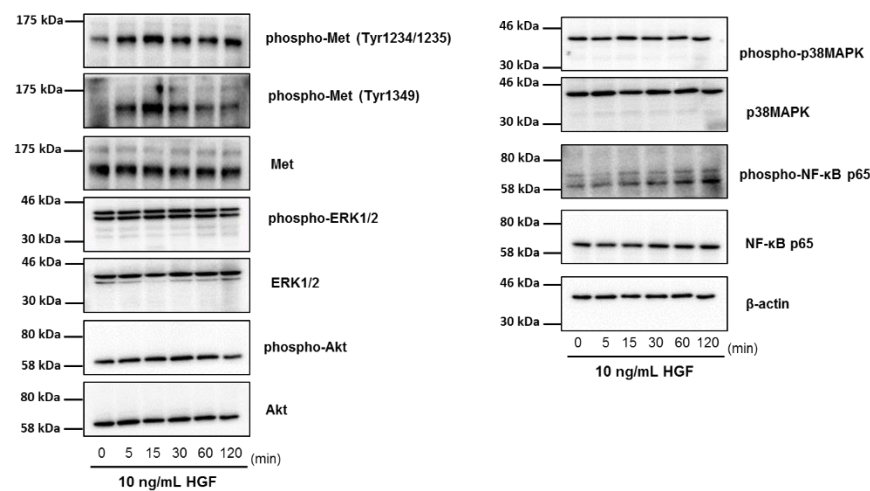

Figure 3A MC3T3-E1

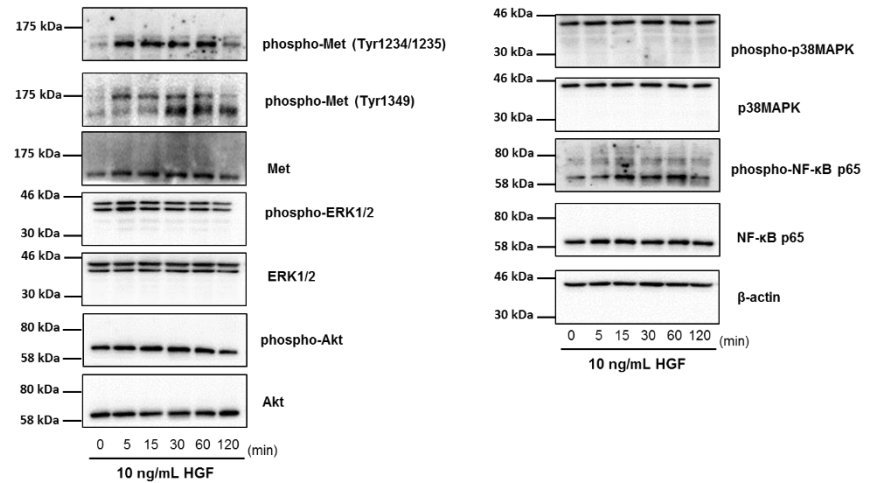

Figure 3A BMSCs

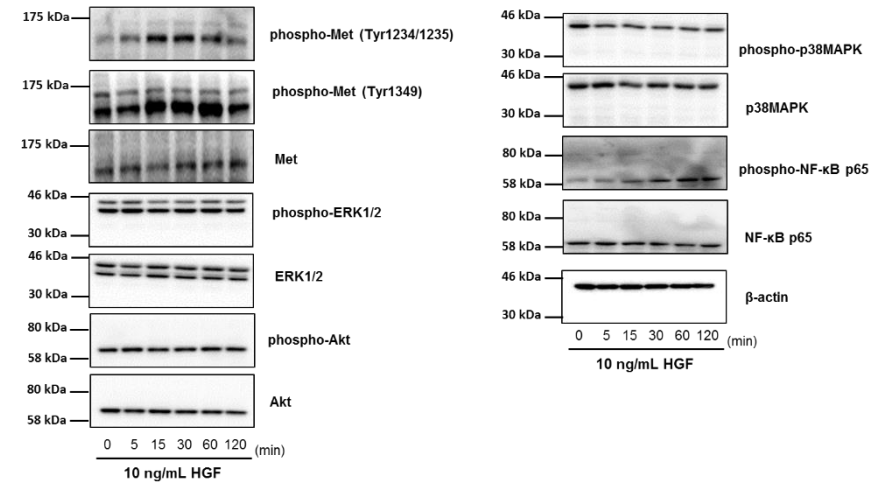

Figure 4C

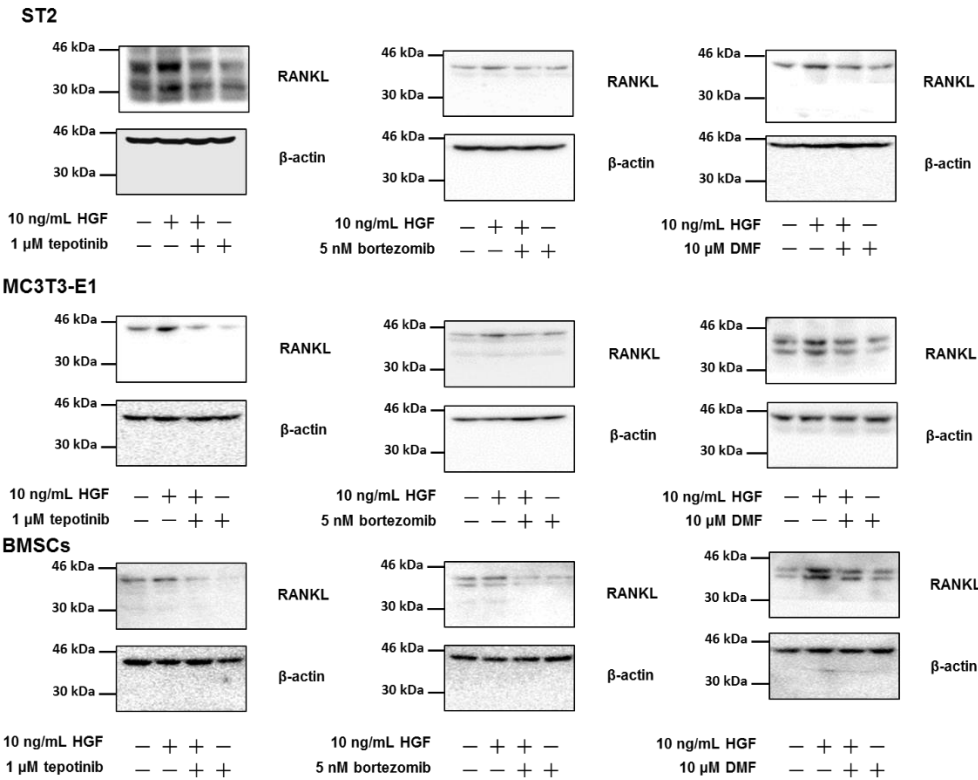

Figure S3

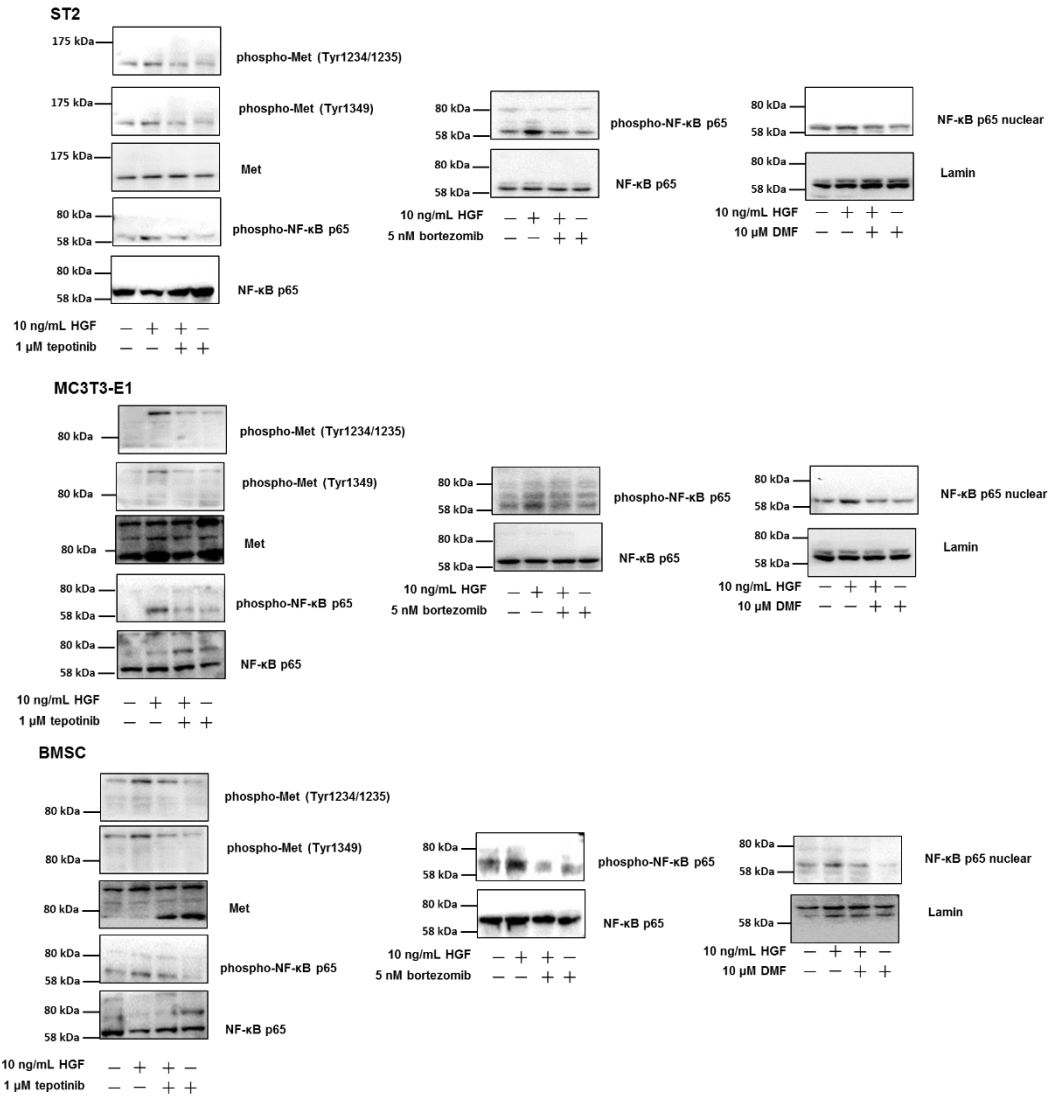

Supplement: s1 [file s1]
